# Supplementary material
Source: publisher site journal article supplement (https://static.cambridge.org/content/id/urn:cambridge.org:id:article:S1365100518000755/resource/name/S1365100518000755supp001.pdf)
Supplement: Supplementary file 1 [file S1365100518000755supp001.pdf]

## A Addendum

### A.1 The derivation of the labor demand functions

In this section, for notational simplicity, we shall use  $H$  instead of  $H_P$  to denote the amount of skilled labor used in productive activities. Given A1, profit maximization yields

$$Y = kK$$

and

$$Y = [(A_L L)^\rho + (A_H H)^\rho]^{1/\rho},$$

where  $L, H$  are chosen so as to solve the following problem

$$\begin{aligned} \min_{L, H} \quad & w_L L + w_H H \\ Y^\rho \quad &= (A_L L)^\rho + (A_H H)^\rho. \end{aligned}$$

The Lagrangean is:

$$\Lambda(L, H, \lambda) = w_L L + w_H H + \lambda[Y^\rho - (A_L L)^\rho - (A_H H)^\rho].$$

The first order conditions are:

$$w_H = \lambda \rho A_H^\rho H^{\rho-1}, \tag{30}$$

$$w_L = \lambda \rho A_L^\rho L^{\rho-1}, \tag{31}$$

$$Y^\rho = (A_L L)^\rho + (A_H H)^\rho. \tag{32}$$

From equations (30) and (31), it follows that

$$\frac{H}{L} = \left( \frac{w_H}{w_L} \right)^{\frac{1}{\rho-1}} \left( \frac{A_H}{A_L} \right)^{-\frac{\rho}{\rho-1}}. \quad (33)$$

Then, by A2, we have  $A_H = \mu A_L$ , and equation (33) becomes

$$\frac{H}{L} = \left( \frac{w_H}{w_L} \right)^{\frac{1}{\rho-1}} (\mu)^{-\frac{\rho}{\rho-1}} \quad (34)$$

Then, equation (32) can be written as

$$Y^\rho = L^\rho [(A_L)^\rho + (A_H H/L)^\rho] = L^\rho \left[ (A_L)^\rho + (A_H)^\rho \left( \frac{w_H}{w_L} \right)^{\frac{\rho}{\rho-1}} (\mu)^{-\frac{\rho^2}{\rho-1}} \right]$$

or, given A2, and using  $Y = kK$

$$L = \frac{kK}{A_L \left[ 1 + \left( \frac{w_H}{w_L} \right)^{\frac{\rho}{\rho-1}} (\mu)^{-\frac{\rho}{\rho-1}} \right]^{\frac{1}{\rho}}}$$

Similarly, using equation (34),

$$H = \frac{kK}{A_L \left[ 1 + \left( \frac{w_H}{w_L} \right)^{\frac{\rho}{\rho-1}} (\mu)^{-\frac{\rho}{\rho-1}} \right]^{\frac{1}{\rho}}} \left( \frac{w_H}{w_L} \right)^{\frac{1}{\rho-1}} (\mu)^{-\frac{\rho}{\rho-1}}$$

or

$$H = \frac{kK}{A_L \mu \left[ 1 + \left( \frac{w_H}{w_L} \right)^{-\frac{\rho}{\rho-1}} (\mu)^{\frac{\rho}{\rho-1}} \right]^{\frac{1}{\rho}}}$$

Equations (3) and (4) follow by substituting  $\sigma = (w_H/w_L)$ .
